# Supplementary material for: Spatio-temporal analysis of malaria incidence in the Peruvian Amazon Region between 2002 and 2013
Source: PubMed Central journal article supplement (PMC5238441; doi:10.1038/srep40350), 2017-01-16
Supplement: srep40350-s1.pdf [file srep40350-s1.pdf]

Supplementary information for

**Spatio-temporal analysis of malaria incidence in the  
Peruvian Amazon Region between 2002 and 2013**

Veronica Soto-Calle<sup>+</sup>, Angel Rosas-Aguirre<sup>+</sup>, Alejandro Llanos-Cuentas, Emmanuel Abatih, Redgi DeDeken, Hugo Rodriguez, Anna Rosanas- Urgell, Dionicia Gamboa, Umberto D'Alessandro, Annette Erhart<sup>+</sup>, Niko Speybroeck<sup>+</sup>

+These authors contributed equally to this work

This document includes: -Supplementary Table S1

**Supplementary Table S1.** Temporal clusters of malaria cases at district level (Pastaza, Balsapuerto, Tigre, Alto Nanay, Yavari, Soplin, Sarayacu) in Loreto Region, 2002-2013

| Pastaza District     |         |                  |                         |         |                  |                              |         |                  |       |
|----------------------|---------|------------------|-------------------------|---------|------------------|------------------------------|---------|------------------|-------|
| All species          |         |                  | <i>Plasmodium vivax</i> |         |                  | <i>Plasmodium falciparum</i> |         |                  |       |
| Year                 | Cluster | RR               | p                       | Cluster | RR               | p                            | Cluster | RR               | p     |
| 2002                 | Jan     | 2.10             | 0.001                   | Nov-Dec | 1.66             | 0.001                        | Jan     | 2.81             | 0.001 |
| 2003                 | Aug-Oct | 1.96             | 0.001                   | Aug-Oct | 1.55             | 0.001                        | Jul-Nov | 2.53             | 0.001 |
| 2004                 | Feb-Apr | 1.84             | 0.001                   | Feb-Apr | 2.39             | 0.001                        | Feb-Jun | 1.48             | 0.001 |
| 2005                 | Jun     | 1.54             | 0.001                   | Nov-Dec | 2.53             | 0.001                        | Apr-Sep | 1.68             | 0.001 |
| 2006                 | Apr-Aug | 1.94             | 0.001                   | Apr-Aug | 1.76             | 0.001                        | Apr-Sep | 2.69             | 0.001 |
| 2007                 | Jun-Sep | 2.48             | 0.001                   | Jun-Sep | 3.27             | 0.001                        | May-Sep | 1.97             | 0.001 |
| 2008                 | Aug     | 1.36             | 0.001                   | Jan-Feb | 1.30             | 0.001                        | Aug     | 1.83             | 0.001 |
| 2009                 | Jan-Jun | 3.48             | 0.001                   | Jan-Jun | 2.93             | 0.001                        | Jan-Jun | 8.09             | 0.001 |
| 2010                 | Sep     | 2.13             | 0.001                   | Sep     | 2.32             | 0.001                        | May-Aug | 2.27             | 0.231 |
| 2011                 | Apr-Jul | 2.02             | 0.001                   | Apr-Jul | 2.05             | 0.001                        | Dec     | 21.55            | 0.001 |
| 2012                 | Jul-Dec | 1.87             | 0.001                   | Nov     | 2.04             | 0.001                        | Jul-Dec | 4.17             | 0.001 |
| 2013                 | Mar-Apr | 1.33             | 0.001                   | Sep-Nov | 1.39             | 0.001                        | Jan-Jun | 2.73             | 0.001 |
| Balsapuerto District |         |                  |                         |         |                  |                              |         |                  |       |
| All species          |         |                  | <i>Plasmodium vivax</i> |         |                  | <i>Plasmodium falciparum</i> |         |                  |       |
| Year                 | Cluster | RR               | p                       | Cluster | RR               | p                            | Cluster | RR               | p     |
| 2002                 | Sep     | 1.45             | 0.001                   | Sep-Oct | 1.45             | 0.001                        | Jan-Apr | 1.42             | 0.001 |
| 2003                 | Jan-May | 2.48             | 0.001                   | Jan-May | 2.88             | 0.001                        | Feb-May | 2.05             | 0.001 |
| 2004                 | Feb-May | 1.58             | 0.001                   | Mar-May | 2.14             | 0.001                        | Jan-Feb | 1.60             | 0.001 |
| 2005                 | Jul-Sep | 1.46             | 0.001                   | Jul-Sep | 1.40             | 0.001                        | Apr-Sep | 1.65             | 0.001 |
| 2006                 | Jul-Dec | 1.42             | 0.001                   | Aug-Sep | 1.36             | 0.001                        | Jul-Dec | 1.99             | 0.001 |
| 2007                 | Jan-May | 2.36             | 0.001                   | Jan-May | 2.37             | 0.001                        | Jan-May | 2.36             | 0.001 |
| 2008                 | Jul-Dec | 1.96             | 0.001                   | Jul-Dec | 1.92             | 0.001                        | Jul-Dec | 2.02             | 0.001 |
| 2009                 | Jan-May | 3.54             | 0.001                   | Jan-May | 3.14             | 0.001                        | Jan-Apr | 5.69             | 0.001 |
| 2010                 | Jan-Apr | 4.44             | 0.001                   | Jan-Apr | 5.34             | 0.001                        | Mar-May | 3.96             | 0.455 |
| 2011                 | Oct     | 5.39             | 0.022                   | Oct     | 5.39             | 0.022                        |         | No cluster found |       |
| 2012                 | Sep-Dec | 8.00             | 0.057                   | Sep-Dec | 8.00             | 0.057                        |         | No cluster found |       |
| 2013                 | Feb-Mar | 4.28             | 0.001                   | Feb-Mar | 4.28             | 0.001                        |         | No cluster found |       |
| Tigre District       |         |                  |                         |         |                  |                              |         |                  |       |
| All species          |         |                  | <i>Plasmodium vivax</i> |         |                  | <i>Plasmodium falciparum</i> |         |                  |       |
| Year                 | Cluster | RR               | p                       | Cluster | RR               | p                            | Cluster | RR               | p     |
| 2002                 | Jun-Nov | 2.71             | 0.001                   | Jul-Oct | 3.34             | 0.001                        | Jun-Nov | 2.46             | 0.001 |
| 2003                 | Sep-Nov | 1.71             | 0.001                   | Jul-Nov | 2.30             | 0.001                        | May     | 2.67             | 0.001 |
| 2004                 | Jul-Sep | 2.15             | 0.001                   | Jul     | 1.96             | 0.001                        | Jul-Oct | 4.35             | 0.001 |
| 2005                 | Jul-Sep | 2.11             | 0.001                   | Jul-Sep | 2.17             | 0.001                        | Aug-Nov | 2.92             | 0.001 |
| 2006                 | May-Oct | 2.06             | 0.001                   | May-Oct | 2.08             | 0.001                        | Jul-Oct | 2.48             | 0.001 |
| 2007                 | Mar-Apr | 3.09             | 0.001                   | Mar-Apr | 3.13             | 0.001                        | Mar-Apr | 2.91             | 0.001 |
| 2008                 | Oct-Dec | 2.34             | 0.001                   | Oct-Dec | 2.37             | 0.001                        | Nov-Dec | 2.41             | 0.001 |
| 2009                 | Apr-Jun | 2.37             | 0.001                   | Mar-Jun | 2.28             | 0.001                        | Apr-Sep | 3.50             | 0.001 |
| 2010                 | Jan     | 2.10             | 0.183                   | Jan     | 2.31             | 0.092                        |         | No cluster found |       |
| 2011                 | Aug-Dec | 11.61            | 0.001                   | Aug-Dec | 12.31            | 0.001                        | Nov     | 10.63            | 0.001 |
| 2012                 | Mar-Jul | 3.69             | 0.001                   | Mar-Jul | 3.74             | 0.001                        | Mar-Jul | 2.55             | 0.102 |
| 2013                 | Jun-Nov | 3.99             | 0.001                   | Jun-Nov | 3.82             | 0.001                        | Jun-Nov | 4.30             | 0.001 |
| Alto Nanay District  |         |                  |                         |         |                  |                              |         |                  |       |
| All species          |         |                  | <i>Plasmodium vivax</i> |         |                  | <i>Plasmodium falciparum</i> |         |                  |       |
| Year                 | Cluster | RR               | p                       | Cluster | RR               | p                            | Cluster | RR               | p     |
| 2002                 | Mar-Jul | 2.31             | 0.001                   | Mar-Aug | 2.62             | 0.001                        | Mar-Jun | 2.36             | 0.001 |
| 2003                 | Mar-Jul | 1.61             | 0.001                   | May-Oct | 1.46             | 0.005                        | Apr-Jul | 2.72             | 0.001 |
| 2004                 | May     | 3.82             | 0.001                   | May     | 3.72             | 0.001                        | Apr-Jun | 3.35             | 0.001 |
| 2005                 | Nov-Dec | 2.28             | 0.001                   | Nov-Dec | 2.17             | 0.001                        | Dec     | 3.16             | 0.001 |
| 2006                 | Jan-Jun | 3.06             | 0.001                   | Jan-Jun | 2.17             | 0.001                        | Jan-Jun | 10.40            | 0.001 |
| 2007                 | Mar-Aug | 3.57             | 0.001                   | Mar-Aug | 4.00             | 0.001                        | May-Oct | 3.15             | 0.001 |
| 2008                 | Nov     | 2.00             | 0.001                   | Nov     | 1.95             | 0.001                        | Nov     | 2.17             | 0.218 |
| 2009                 | Aug-Dec | 4.79             | 0.001                   | Aug-Dec | 5.06             | 0.001                        | Nov     | 4.55             | 0.005 |
| 2010                 | Feb     | 2.96             | 0.001                   | Dec     | 1.90             | 0.008                        | Feb     | 4.61             | 0.001 |
| 2011                 | Jan     | 2.29             | 0.001                   | Jan     | 1.62             | 0.005                        | Jan-Feb | 2.96             | 0.001 |
| 2012                 | Jul-Dec | 1.68             | 0.001                   | Jul-Dec | 1.53             | 0.001                        | Nov-Dec | 2.28             | 0.001 |
| 2013                 | Apr-Aug | 1.35             | 0.001                   | Jun-Aug | 1.63             | 0.001                        | Jan     | 1.81             | 0.002 |
| Yavari District      |         |                  |                         |         |                  |                              |         |                  |       |
| All species          |         |                  | <i>Plasmodium vivax</i> |         |                  | <i>Plasmodium falciparum</i> |         |                  |       |
| Year                 | Cluster | RR               | p                       | Cluster | RR               | p                            | Cluster | RR               | p     |
| 2002                 | Jul-Oct | 13.71            | 0.001                   | Jul-Oct | 13.69            | 0.001                        | Jul-Oct | 13.77            | 0.001 |
| 2003                 | Apr-Aug | 3.83             | 0.001                   | Apr-Aug | 3.28             | 0.001                        | Apr-Jul | 7.65             | 0.001 |
| 2004                 | Feb-Jul | 1.55             | 0.002                   | May-Sep | 1.48             | 0.010                        | Mar-Aug | 6.18             | 0.001 |
| 2005                 | Jun-Jul | 5.44             | 0.001                   | Jun-Jul | 4.41             | 0.001                        | Jun-Jul | 12.46            | 0.001 |
| 2006                 | Jun-Jul | 8.75             | 0.001                   | Jun-Jul | 9.34             | 0.001                        | Jun     | 7.38             | 0.001 |
| 2007                 | Mar-Jul | 3.70             | 0.001                   | Mar-Jul | 4.03             | 0.001                        | Mar-May | 3.83             | 0.001 |
| 2008                 | Jan-Apr | 11.72            | 0.001                   | Jan-Apr | 9.43             | 0.001                        | Jan-Apr | 40.21            | 0.001 |
| 2009                 | Jul-Aug | 4.49             | 0.001                   | Jul-Aug | 5.11             | 0.001                        | Jun-Aug | 3.34             | 0.001 |
| 2010                 | Jun     | 2.51             | 0.001                   | Jun-Jul | 1.84             | 0.001                        | May-Jun | 2.99             | 0.001 |
| 2011                 | Jun-Jul | 2.51             | 0.001                   | Jun-Jul | 2.35             | 0.001                        | Jun-Jul | 3.45             | 0.001 |
| 2012                 | Mar-Aug | 2.38             | 0.001                   | Mar-Aug | 2.60             | 0.001                        | May-Sep | 1.81             | 0.001 |
| 2013                 | Apr-Jul | 3.01             | 0.001                   | Mar-Aug | 3.08             | 0.001                        | Apr-Jul | 3.75             | 0.001 |
| Soplin District      |         |                  |                         |         |                  |                              |         |                  |       |
| All species          |         |                  | <i>Plasmodium vivax</i> |         |                  | <i>Plasmodium falciparum</i> |         |                  |       |
| Year                 | Cluster | RR               | p                       | Cluster | RR               | p                            | Cluster | RR               | p     |
| 2002                 | Jun-Aug | 3.00             | 0.001                   | Jun-Jul | 3.15             | 0.001                        | Aug     | 10.77            | 0.008 |
| 2003                 | Feb-Apr | 2.50             | 0.001                   | Feb-Apr | 2.52             | 0.001                        |         | No cluster found |       |
| 2004                 | Nov     | 2.00             | 0.001                   | Nov     | 2.16             | 0.001                        | Mar-Jun | 11.00            | 0.001 |
| 2005                 | Oct-Dec | 2.67             | 0.001                   | Oct-Dec | 2.46             | 0.001                        | Oct-Dec | 3.32             | 0.001 |
| 2006                 | Feb-Jul | 1.75             | 0.001                   | Feb-Jul | 1.48             | 0.001                        | Jan-Apr | 2.93             | 0.001 |
| 2007                 | Mar-Jun | 2.24             | 0.001                   | Mar-Jun | 1.93             | 0.001                        | Mar-Jun | 5.12             | 0.001 |
| 2008                 | Dec     | 5.55             | 0.001                   | Dec     | 5.73             | 0.001                        | Nov     | 18.67            | 0.003 |
| 2009                 | Nov     | 2.00             | 0.001                   | Jan-Jun | 2.66             | 0.001                        | Oct-Dec | 126.86           | 0.001 |
| 2010                 | Feb-May | 2.27             | 0.001                   | Feb-Apr | 2.22             | 0.001                        | Jan-May | 3.79             | 0.001 |
| 2011                 | Jan-Jun | 1.57             | 0.006                   | Jan-Jun | 1.92             | 0.001                        | Dec     | 2.07             | 0.211 |
| 2012                 | Jul-Dec | 2.82             | 0.001                   | Jun-Nov | 2.00             | 0.001                        | Aug-Dec | 12.07            | 0.001 |
| 2013                 | Jun-Jul | 2.97             | 0.001                   | May-Jul | 2.26             | 0.001                        | Jun-Jul | 4.98             | 0.001 |
| Sarayacu District    |         |                  |                         |         |                  |                              |         |                  |       |
| All species          |         |                  | <i>Plasmodium vivax</i> |         |                  | <i>Plasmodium falciparum</i> |         |                  |       |
| Year                 | Cluster | RR               | p                       | Cluster | RR               | p                            | Cluster | RR               | p     |
| 2002                 | Nov     | 7.44             | 0.018                   | Nov     | 9.57             | 0.006                        |         | No cluster found |       |
| 2003                 | Jun-Aug | 11.87            | 0.001                   | Jun-Aug | 14.84            | 0.001                        | May-Aug | 7.87             | 0.388 |
| 2004                 | Jun-Jul | 3.21             | 0.091                   | Jun-Jul | 3.08             | 0.153                        |         | No cluster found |       |
| 2005                 | Jan-Jun | 2.64             | 0.325                   | Mar-Jun | 3.98             | 0.118                        |         | No cluster found |       |
| 2006                 | Feb     | 7.22             | 0.154                   | Feb     | 9.03             | 0.118                        |         | No cluster found |       |
| 2007                 |         | No cluster found |                         |         | No cluster found |                              |         | No cluster found |       |
| 2008                 |         | No cluster found |                         |         | No cluster found |                              |         | No cluster found |       |
| 2009                 | Dec     | 7.18             | 0.455                   | Aug-Sep | 4.98             | 0.660                        |         | No cluster found |       |
| 2010                 | Mar     | 41.56            | 0.001                   | Mar     | 41.56            | 0.001                        |         | No cluster found |       |
| 2011                 | Jan-Feb | 16.42            | 0.001                   | Jan-Feb | 19.71            | 0.001                        |         | No cluster found |       |
| 2012                 | Jan-Feb | 4.08             | 0.467                   | Jan-Jun | 6.07             | 0.345                        |         | No cluster found |       |
| 2013                 |         | No cluster found |                         |         | No cluster found |                              |         | No cluster found |       |

RR = Relative Risk
